# Supplementary material for: Structure of the MICU1–MICU2 heterodimer provides insights into the gatekeeping threshold shift
Source: PubMed Central journal article supplement (PMC7055370; doi:10.1107/s2052252520001840), 2020-02-27
Supplement: m-07-00355-sup1.pdf [file m-07-00355-sup1.pdf]

# IUCrJ

**Volume 7 (2020)**

**Supporting information for article:**

**Structure of the MICU1–MICU2 heterodimer provides insights into the gatekeeping threshold shift**

**Jongseo Park, Youngjin Lee, Taein Park, Jung Youn Kang, Sang A Mun, Minwoo Jin, Jihyeong Yang and Soo Hyun Eom**

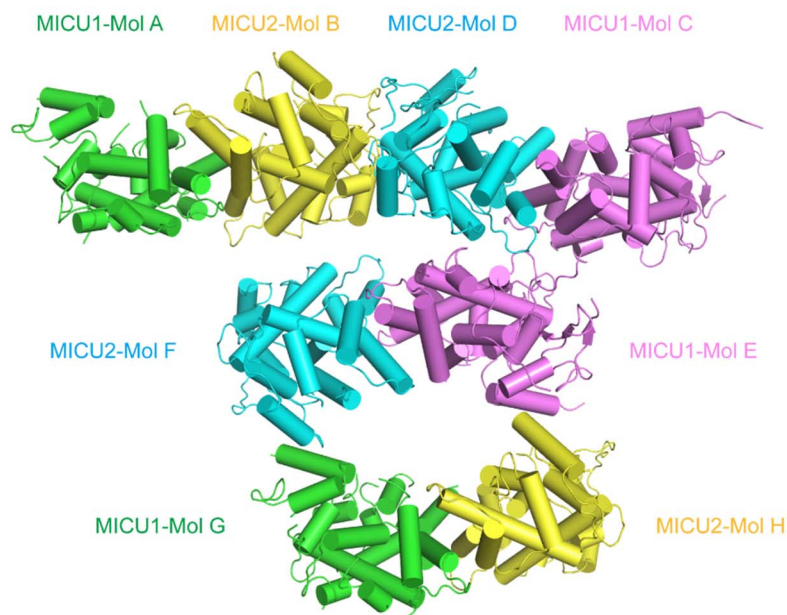

**Figure S1** Four heterodimers consisting of an asymmetric unit. Overall view of the MICU1-MICU2 heterodimer structure occupying the ASU. There are four heterodimers which interact with each other through back-to-back interaction of MICU2. MICU1 is colored in green and violet. MICU2 is colored in yellow and cyan.

| Interface area  | Face-to-Face (F-F) dimer |                 |                 | Back-to-Back (B-B) dimer |                 |
|-----------------|--------------------------|-----------------|-----------------|--------------------------|-----------------|
|                 | MICU1-2                  | MICU1<br>(4NSC) | MICU2<br>(6AGH) | MICU2                    | MICU2<br>(6AGH) |
| Interface 1 (Å) | 654                      | 532             | 361             | 860                      | 1260            |
| Interface 2 (Å) | 346                      | 596             | 406             |                          |                 |

(a)

| Predicted Binding Energy (F-F dimer) | MICU1-2 | MICU1<br>(4NSC) | MICU2<br>(6AGH) |
|--------------------------------------|---------|-----------------|-----------------|
| Interface 1 (kcal/mol)               | -7.6    | -6.9            | -5.5            |
| Interface 2 (kcal/mol)               | -5.2    | -7.0            | -6.0            |

(b)

**Figure S2** Interface area and predicted binding energies of the MICU1-MICU2 heterodimer and other homodimers in MICUs. **(a)** The interface area of the MICU1-MICU2 heterodimer and F-F or B-B MICU homodimers calculated using the PDBePISA web server (PDB ID: 4NSC and 6AGH). MICU1-MICU2 heterodimer (Mol CD) and MICU2 homodimer (Mol BD) in the ASU are abbreviated to MICU1-2 and MICU2, respectively. Only the total interface area is provided in the B-B dimer. **(b)** Predicted binding energies ( $\Delta G$ , kcal/mol) calculated using the PRODIGY web server. Interface area and predicted binding energies of MICU1-MICU2 heterodimer (Mol AB, CD), MICU1 homodimer (Chain AB, CE, DF), and B-B MICU2 homodimers in the ASU (Mol BD, Mol FH in crystal lattice) were calculated for each average.

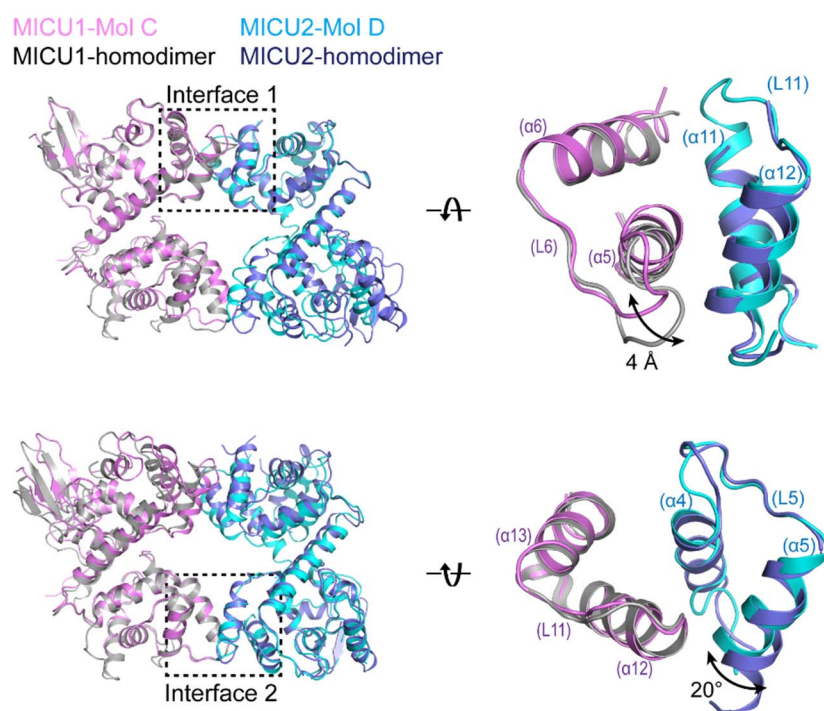

**Figure S3** Conformational change of interface 1 and 2 compared to the apo state of MICU1 and MICU2. Cartoon representation of interface 1 and 2 of superimposed MICU1-MICU2 heterodimer and homodimers in MICU1 and MICU2 based on each interface. The conformational change of interloop (L6) of MICU1 EF-hand 1 and helix  $\alpha 5$  of MICU2 EF-hand 3 is indicated with black arrow.





## MICU2

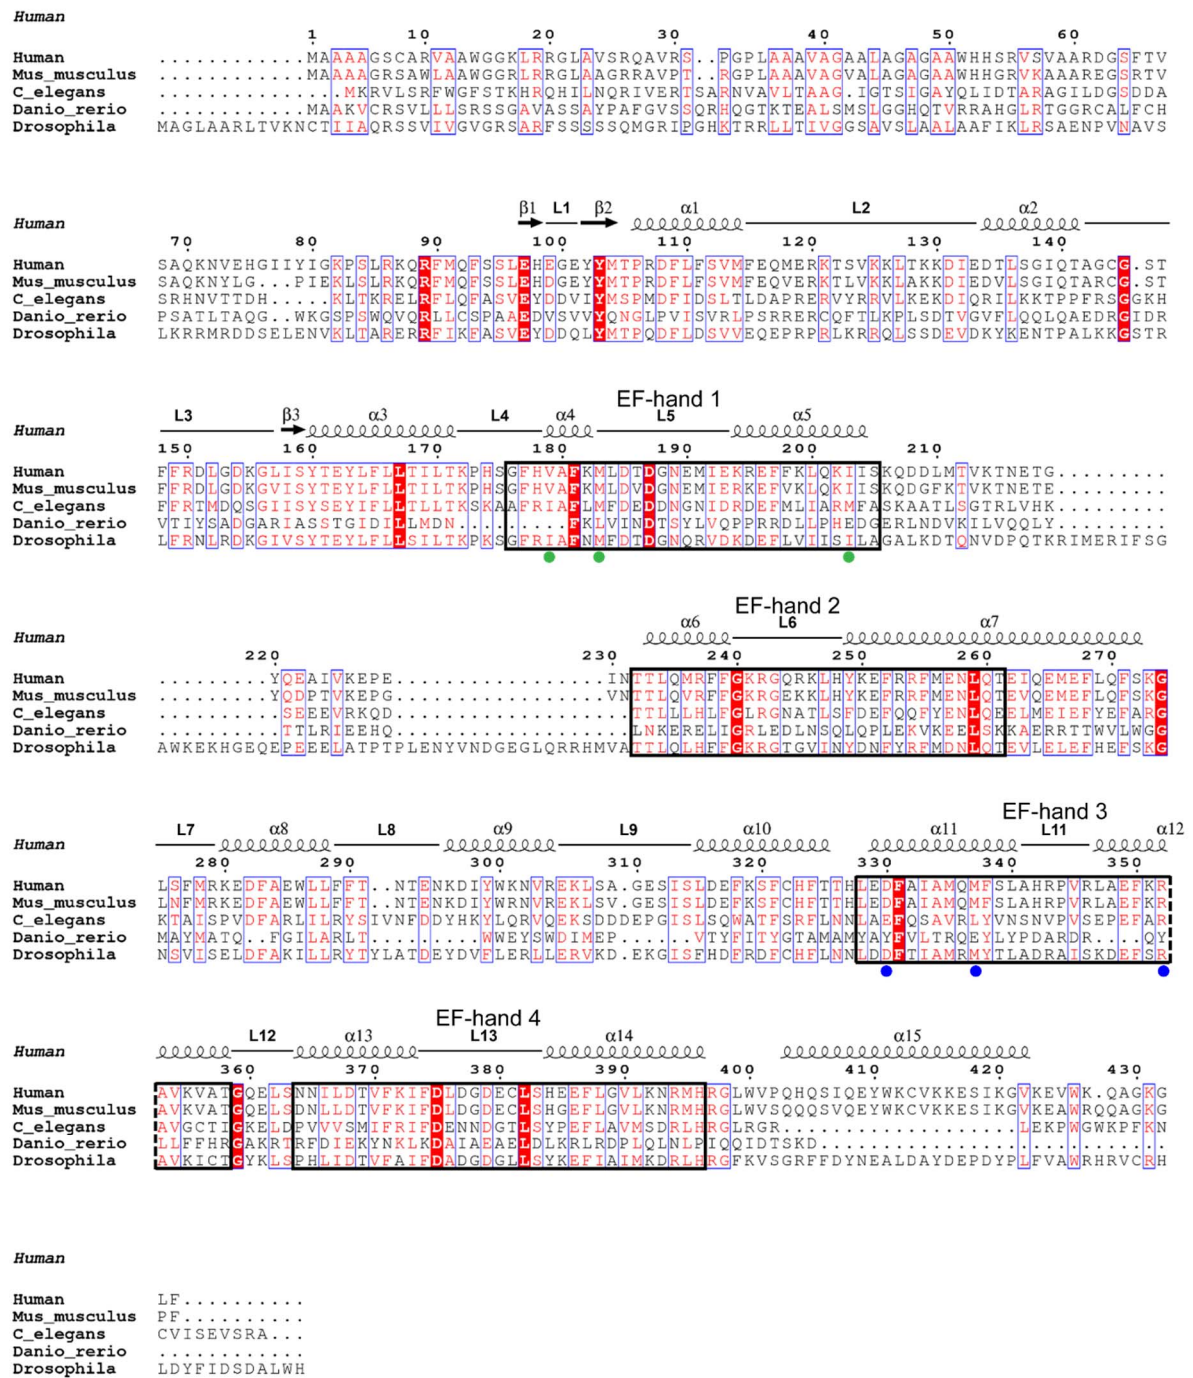

**Figure S5** Multiple sequence alignment of MICU2. The amino acid sequence alignment of MICU2 sequences from various species. Key residues of interface 1 and 2 are marked by blue and green dots, respectively. All of the EF-hands are marked by black solid lined box.

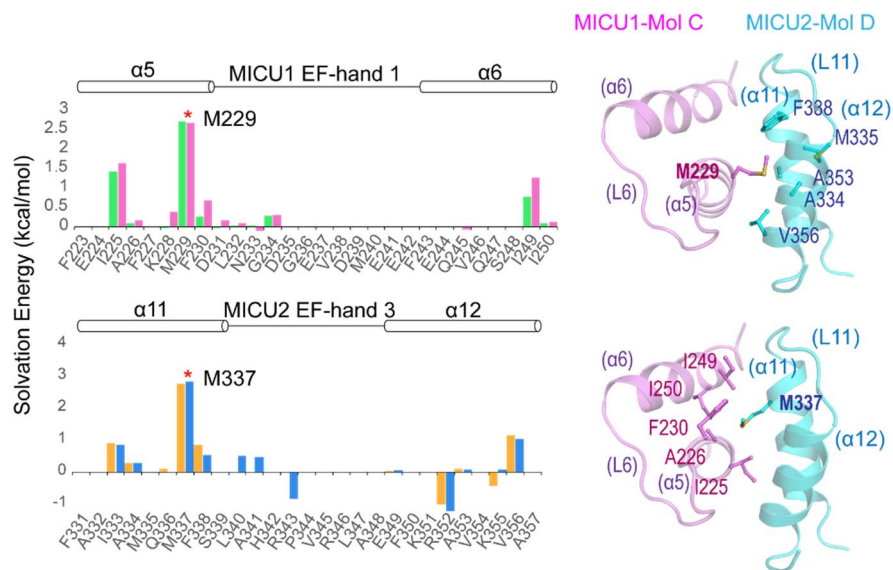

**Figure S6** Solvation energies and cartoon representations of MICU1 and MICU2 in interface 1. Plots of solvation energy (kcal/mol) and cartoon representations for EF-hand 1 and EF hand 3 of MICU1 or MICU2 constituting interface 1. Cartoon representations show the several residues of interface 1 participating in hydrophobic interactions with two methionine knobs of MICU1-MICU2 heterodimer, Mol CD. Asterisks show the residues that have the highest solvation energy value in each EF-hand, M229(MICU1) and M337(MICU2).

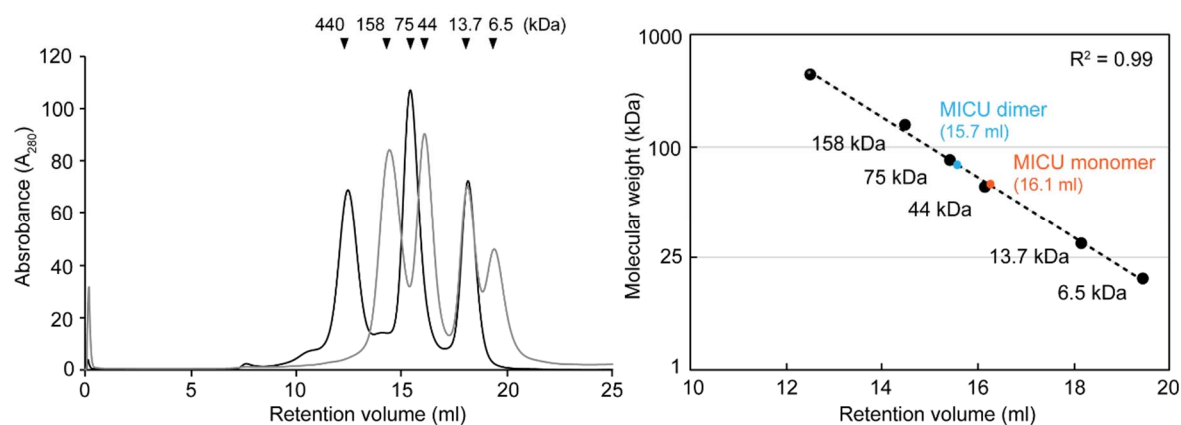

**Figure S7** Calibration chromatogram and standard curve of size-exclusion chromatography (SEC). **(a)** Size-exclusion chromatogram of molecular weight (m.w.) standards containing ferritin (440 kDa), aldolase (158 kDa), Conalbumin (75 kDa), Ovalbumin (43 kDa), ribonuclease A (13.8 kDa), and aprotinin (6.5 kDa). **(b)** A standard curve based on the chromatogram. Cyan and orange dots indicate the eluted position of MICU dimer (89.7 kDa) and MICU monomer (44.9 kDa), respectively.
